# Supplementary material
Source: PubMed Central journal article supplement (PMC8084939)
Supplement: NIHMS1657285-supplement-1.pdf [file NIHMS1657285-supplement-1.pdf]

# Computation-guided optimization of split protein systems

## Supplementary Information

Taylor B. Dolberg<sup>1,2,9</sup>, Anthony T. Meger<sup>3,4,9</sup>, Jonathan D. Boucher<sup>2,5</sup>, William K. Corcoran<sup>2,5</sup>, Elizabeth E. Schauer<sup>1,2</sup>, Alexis N. Prybutok<sup>1,2</sup>, Srivatsan Raman<sup>3,4,8,\*</sup>, Joshua N. Leonard<sup>1,2,5,6,7,\*</sup>

<sup>1</sup>Department of Chemical and Biological Engineering, Northwestern University, Evanston, Illinois 60208, United States

<sup>2</sup>Center for Synthetic Biology, Northwestern University, Evanston, Illinois 60208, United States

<sup>3</sup>Department of Biochemistry, University of Wisconsin-Madison, Madison, Wisconsin 53706, United States

<sup>4</sup>Great Lakes Bioenergy Research Center, University of Wisconsin-Madison, Madison, Wisconsin 53706, United States

<sup>5</sup>Interdisciplinary Biological Sciences Graduate Program, Northwestern University, Evanston, Illinois 60208, United States

<sup>6</sup>Chemistry of Life Processes Institute, Northwestern University, Evanston, Illinois 60208, United States

<sup>7</sup>Member, Robert H. Lurie Comprehensive Cancer Center, Northwestern University, Evanston, Illinois 60208, United States

<sup>8</sup>Department of Bacteriology, University of Wisconsin-Madison, Madison, Wisconsin 53706, United States

<sup>9</sup>These authors contributed equally to this work

### Contact Information

\*Corresponding authors: Srivatsan Raman ([sraman4@wisc.edu](mailto:sraman4@wisc.edu)) and Joshua N. Leonard ([leonard@northwestern.edu](mailto:leonard@northwestern.edu))

### Contents:

Supplementary Figures 1–14

Supplementary Tables 1-4

Supplementary Note 1

## SUPPLEMENTARY FIGURES

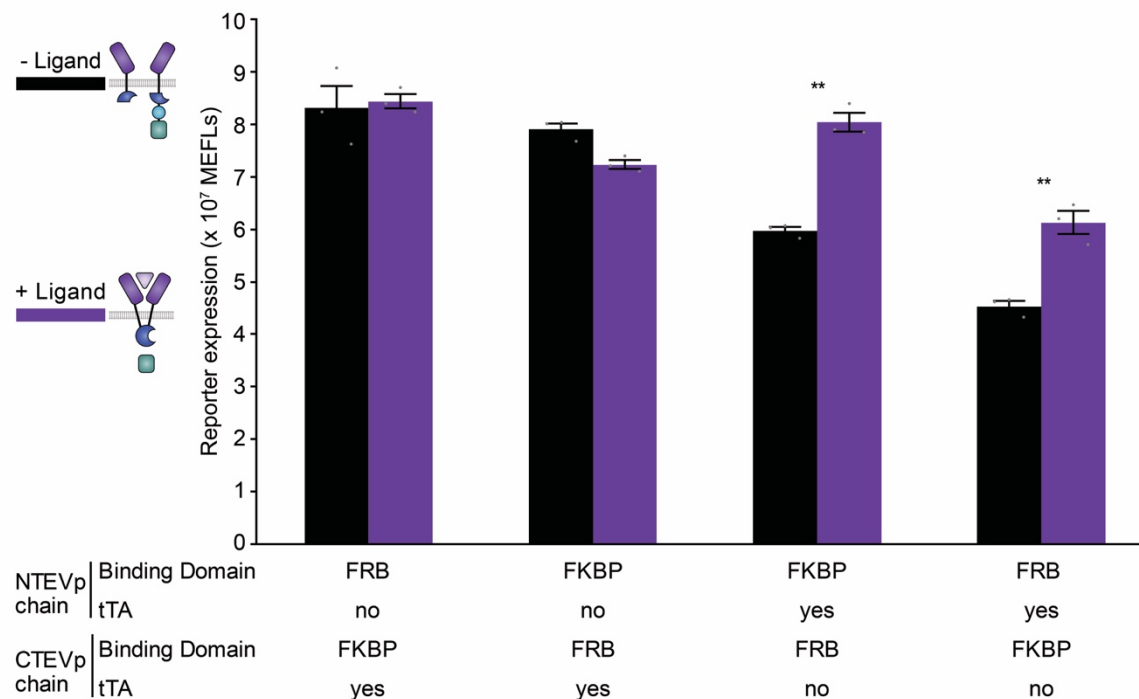

**Supplementary Fig. 1 Comparative evaluation of architectures for the membrane-bound model system.** Experimental analysis of various architectures of canonical 118/119 split TEVp MESA system, swapping the rapamycin binding domains (FRB, FKBP), TEVp fragment (NTEVp, CTEVp), and which chain contains the tTA. Reporter expression driven by reconstituted TEVp cleavage of tTA measured with flow cytometry. All four architectures were observed to have very high ligand independent signaling, suggesting that the 118/119 split of TEVp reconstitutes too easily without the addition of ligand, regardless of rapamycin binding domain and tTA chain architecture. The second architecture was carried forward for further analysis. Error bars depict S.E.M. Two-tailed Student's t-test (\*\* $p \leq 0.01$ ). Experiments were performed in biological triplicate. Results are representative of two independent biological experiments.

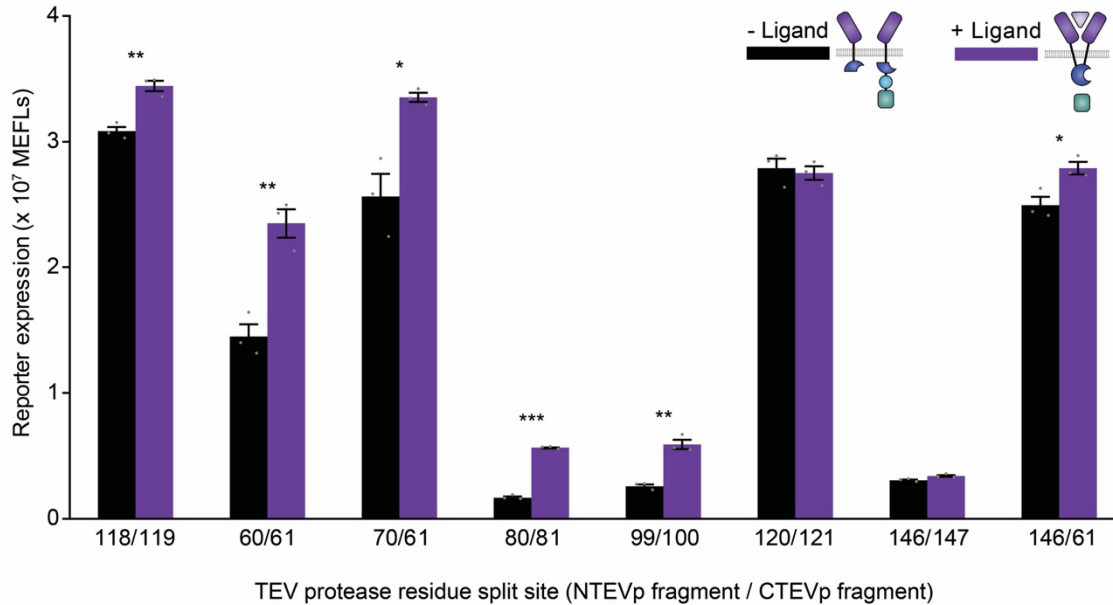

**Supplementary Fig. 2 Evaluation of alternative TEV split sites.** Experimental analysis of TEVp splits other than 118/119 canonical split. The FKBP binding domain is on the NTEVp chain, and the FRB binding domain and tTA are on the CTEVp chain. Reporter expression driven by reconstituted TEVp cleavage of tTA measured with flow cytometry. Alternate splits were observed to have very high ligand independent signaling, or greatly diminished ligand independent and dependent signaling. This suggests that splits other than the canonical split do not have the optimal reconstitution propensity for the membrane bound environment. Error bars depict S.E.M. Two-tailed Student's t-test (\* $p \leq 0.05$ , \*\* $p \leq 0.01$ , \*\*\*  $p \leq 0.001$ ). Experiments were performed in biological triplicate. Results are representative of two independent biological experiments.

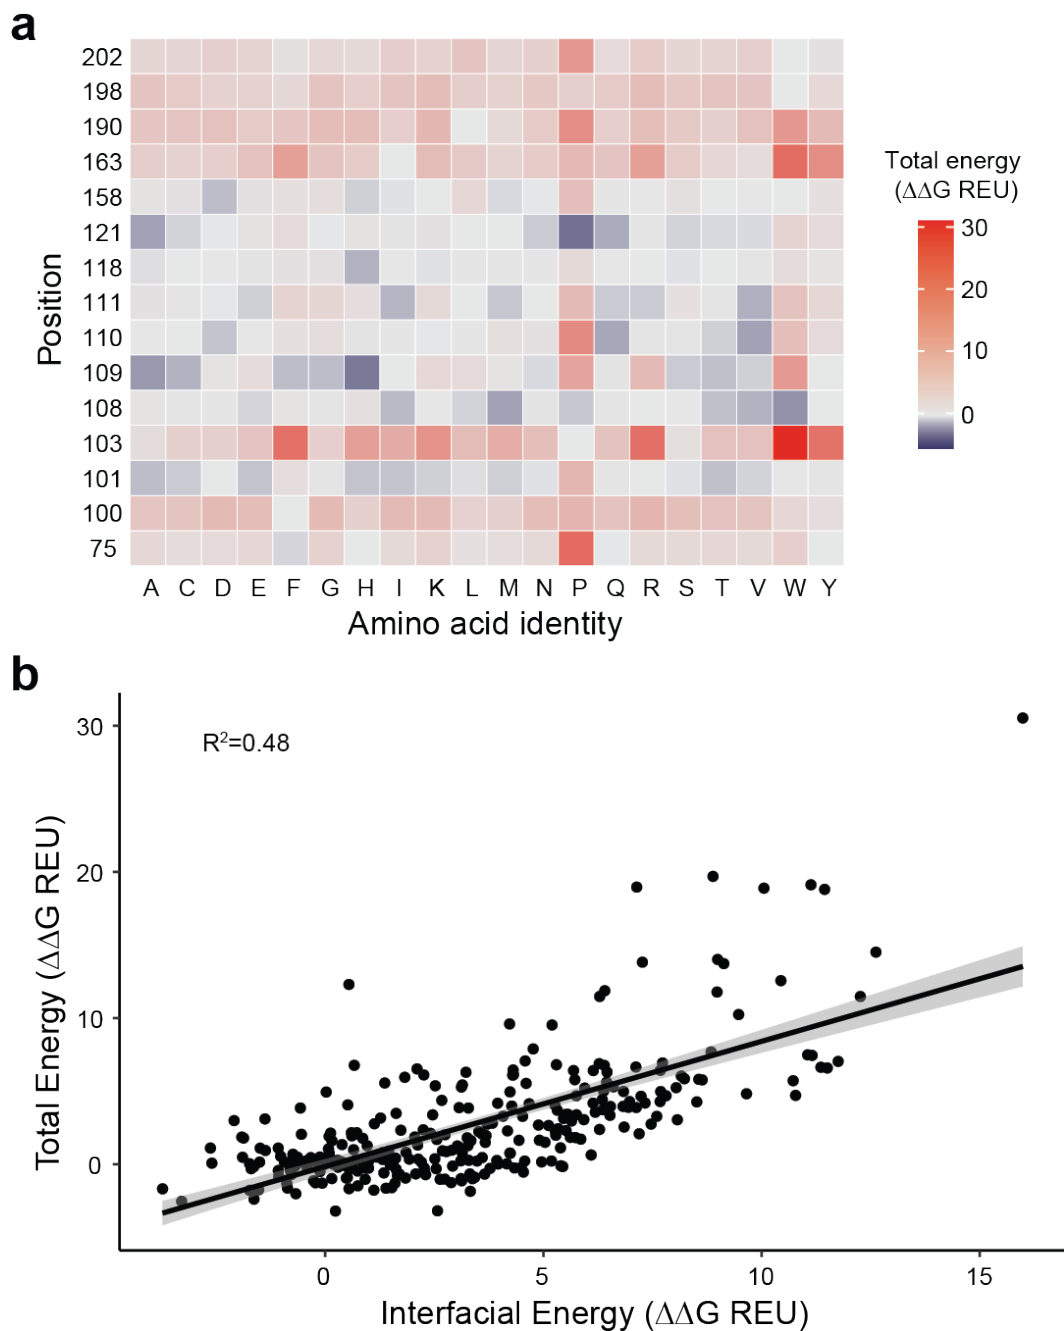

**Supplementary Fig. 3 Mutational scanning of high  $\Delta SASA$  residues using Rosetta. a,** Energetic perturbations to total stability for all amino acid identities at each position are relative to the WT sequence. Change in interfacial energy for all amino acid identities at each position are shown in **Fig. 2b. b,** Energy landscape of all possible single amino acid substitutions at high  $\Delta SASA$  residues. Error bands depict 95% C.I. of linear fit.

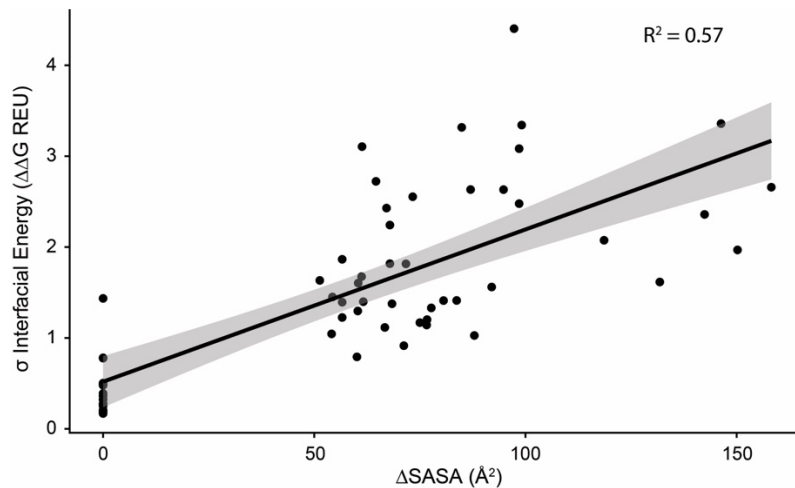

**Supplementary Fig. 4 Reconstitution tuning potential of computed interface energies for positions with varying magnitudes of  $\Delta$ SASA.** Standard deviations ( $\sigma$ ) were computed from Rosetta mutational scanning of 18 randomly selected positions with  $\Delta$ SASA=0 and all positions with  $\Delta$ SASA > 50  $\text{\AA}^2$ . Error bands depict 95% C.I. of linear fit.

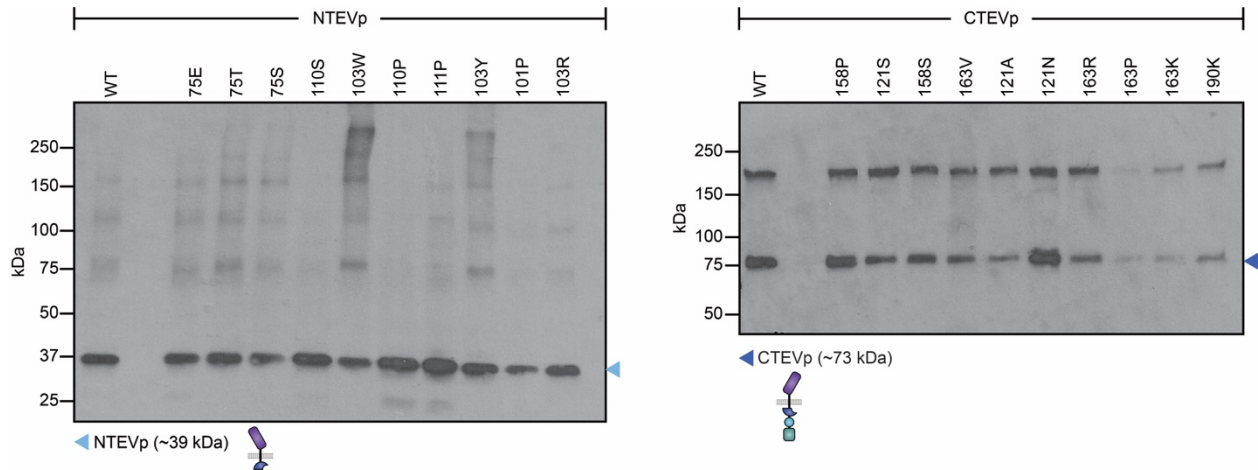

**Supplementary Fig. 5 Western blot analysis of mutant split TEVp expression levels.** Cells were transfected with single mutant chains which contain an N-terminal 3x-FLAG tag, the FKBP binding domain is on the NTEVp chain, and the FRB binding domain and tTA are on the CTEVp chain. Equal masses of protein (1  $\mu$ g/lane) were loaded into each lane to investigate differences in chain expression level.

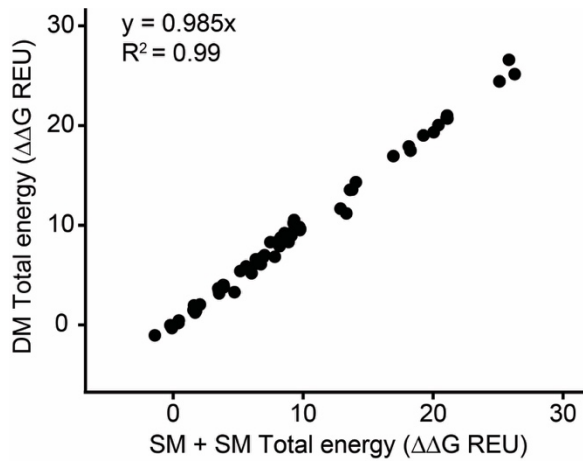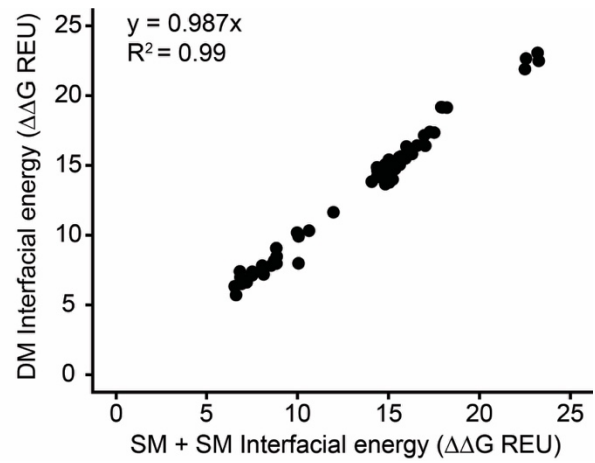

**Supplementary Fig. 6 Additivity of energetic perturbations for mutations as computed by Rosetta.** Data is shown for the sixty-seven double and paired mutants that can be created by combining the twenty single mutants evaluated in **Fig. 2c**.

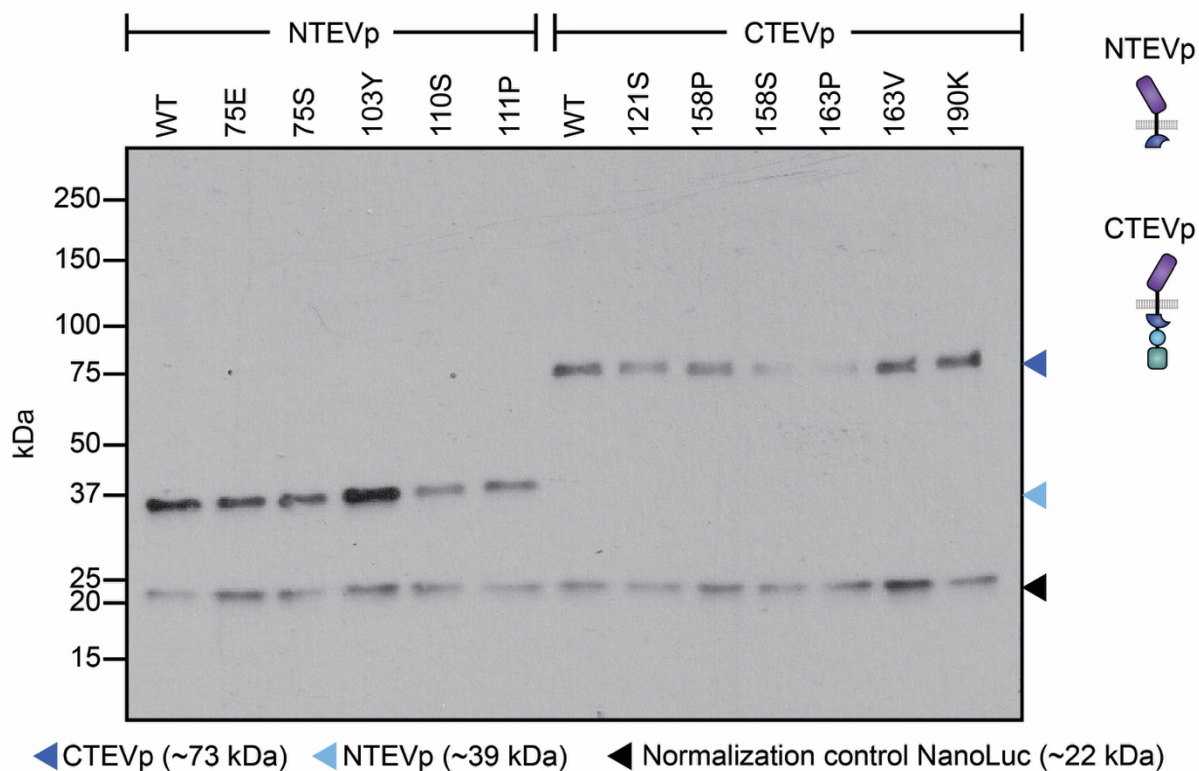

**Supplementary Fig. 7 Western blot analysis of mutant split TEVp expression levels.** Cells were transfected with single mutant chains which contain an N-terminal 3x-FLAG tag. The FKBP binding domain is on the NTEVp chain, and the FRB binding domain and tTA are on the CTEVp chain. Cells were co-transfected with a 3x-FLAG tagged NanoLuciferase as a normalization control (bottom band). Equal masses of protein (3  $\mu$ g/lane) were loaded into each lane to investigate differences in chain expression level.



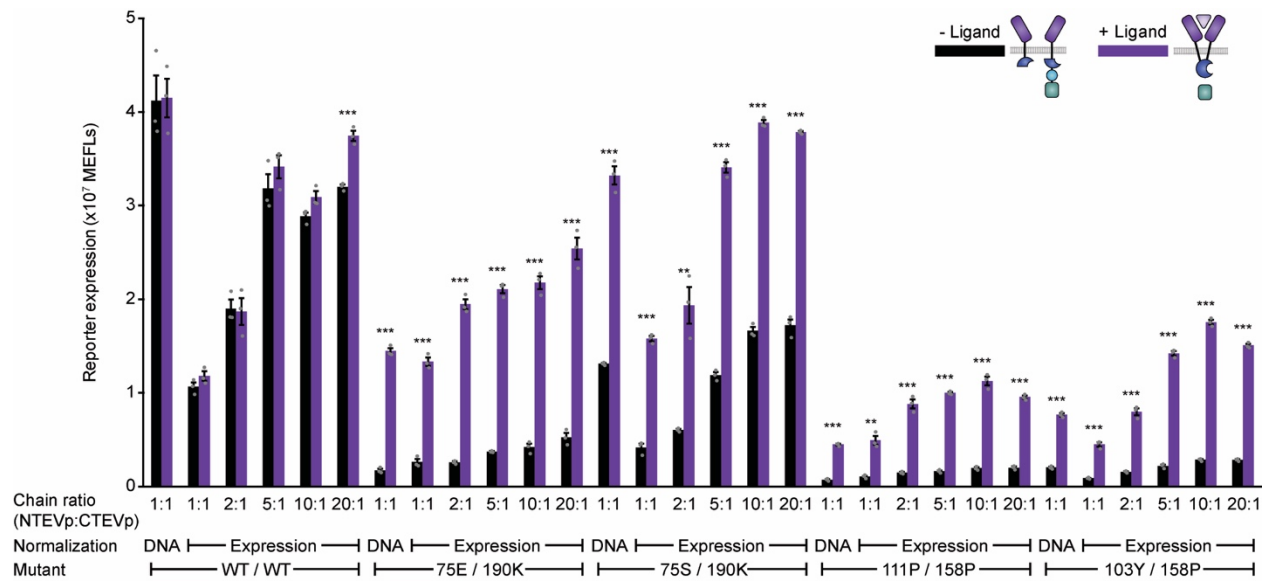

**Supplementary Fig. 8 Optimized splits yield robust performance across a wide range of expression levels.** Experimental analysis of DNA dose normalized and expression normalized select mutant pairs. The FKBP binding domain is on the NTEVp chain, and the FRB binding domain and tTA are on the CTEVp chain. Reconstituted TEVp cleavage of tTA measured by flow cytometry. Mutant pairs show inducible performance that is robust to the expression levels and ratios investigated, however WT performance is poor over this expression regime. Error bars depict S.E.M. Two-tailed Student's t-test (\*\* $p \leq 0.01$ , \*\*\* $p \leq 0.001$ ). Experiments were performed in biological triplicate. Results are representative of two independent biological experiments.

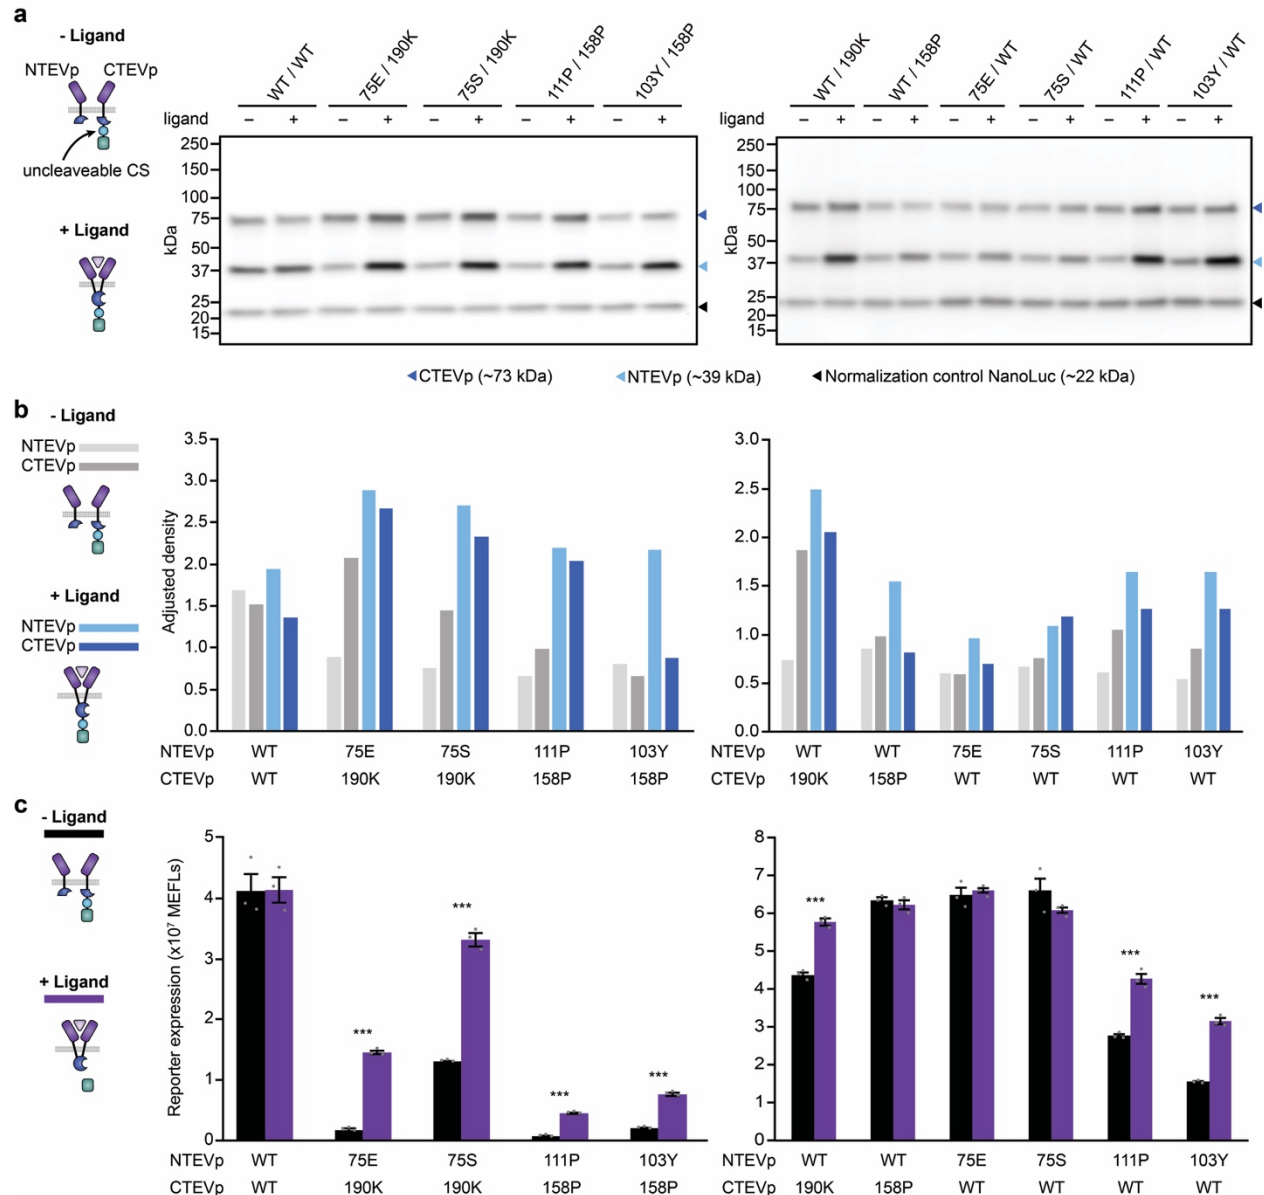

**Supplementary Fig. 9 Effects of ligand addition on expression and accumulation of select split TEVp variants.** **a**, Western blot analysis of split protein expression in the presence and absence of ligand. Cells were co-transfected with a WT or mutant NTEVp chain, a WT or mutant CTEVp chain, and 3x-FLAG tagged NanoLuciferase as a loading control. Arrows at the sides of blots indicate expected sizes for each species (FRB-CTEVp chain with uncleavable cleavage sequence and tTA, FKBP-NTEVp chain, and NanoLuc loading control). Cells were exposed to rapalog ligand (+) or vehicle-only (-) for 24 hours before harvesting cell lysates. Equal masses of protein (8  $\mu$ g/lane) were loaded for each case. **b**, Quantification of Western blot analyses in panel **a**. Band intensities were separately quantified for NTEVp and CTEVp chains; each measurement was normalized using the intensity of the NanoLuciferase loading control in its lane (to correct for variations in gel loading), and each loading-normalized metric was normalized to the corresponding value for the WT CTEVp chain to generate a scaled metric. **c**, To facilitate comparison, these functional data are reproduced from other figures (Left- subset of data from **Supplementary Fig. 8.**, Right-subset of data from **Fig. 2c.**) and describe the split TEVp pairs analyzed in panels **a** and **b**. Error bars depict S.E.M. Two-tailed Student's t-test (\*\*\*)  $p \leq 0.001$ ). Experiments were performed in biological triplicate. Results are representative of two independent biological experiments.

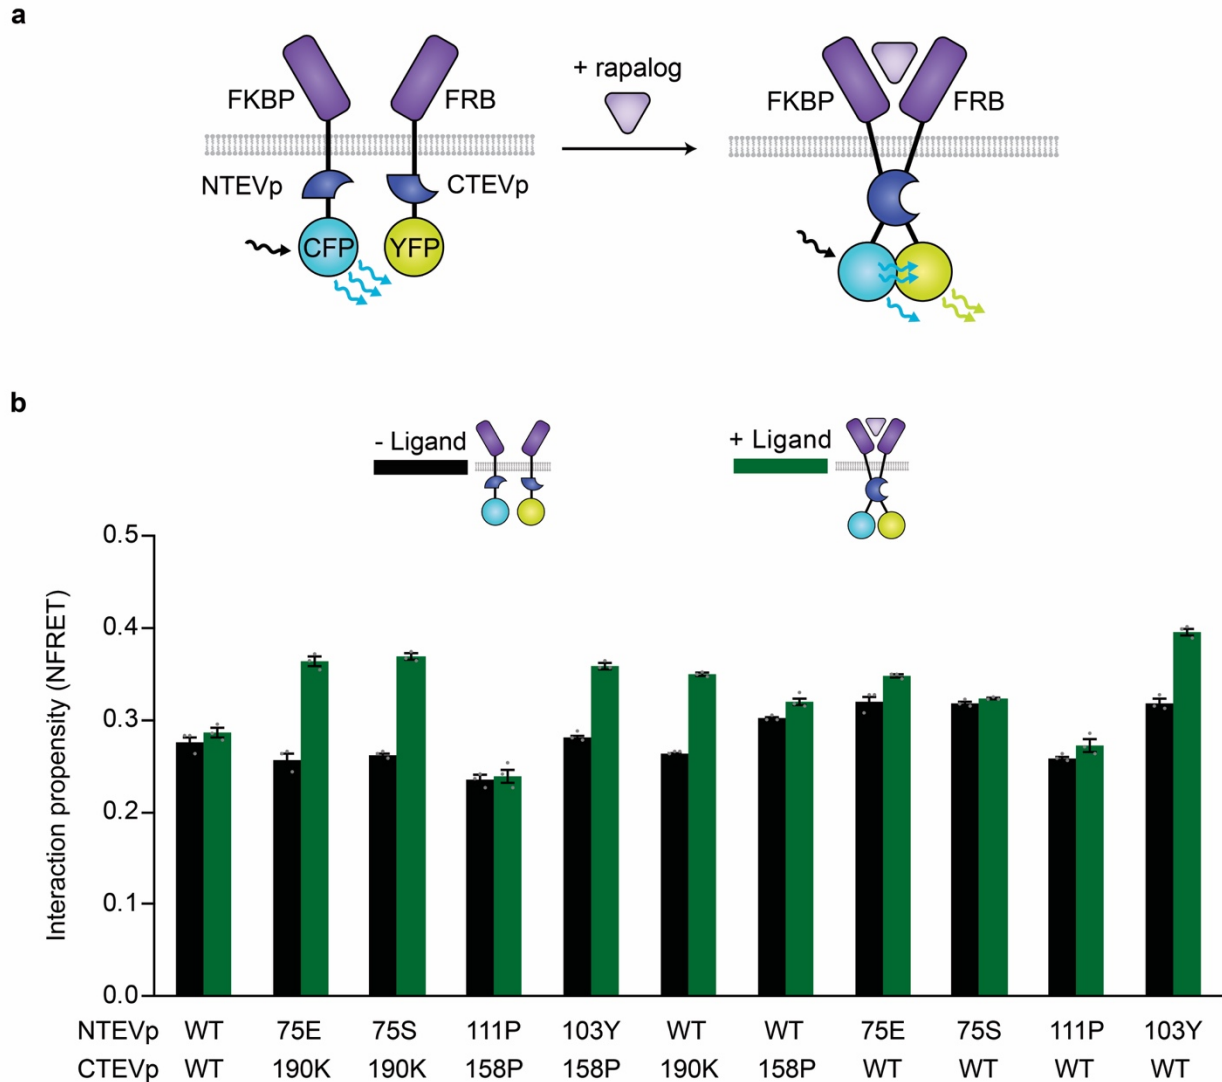

**Supplementary Fig. 10 FRET analysis of select split TEVp paired chain variants.** **a**, This cartoon illustrates the previously validated method<sup>1</sup> for quantifying ligand-independent (left) and ligand-mediated (right) receptor association using Förster resonance energy transfer (FRET). Fluorophores were appended to C-termini of the split TEVp receptor chains: mCerulean (donor) was added onto the FKBP-NTEVp chain, and mVenus (acceptor) was added onto the FRB-CTEVp chain, in place of the cleavage sequence and transcription factor. **b**, Interaction propensity measured by NFRET—a metric of FRET that is expression-normalized on a single cell basis<sup>1</sup>. Error bars depict S.E.M. Experiments were performed in biological triplicate. Results are representative of two independent biological experiments.

**a**

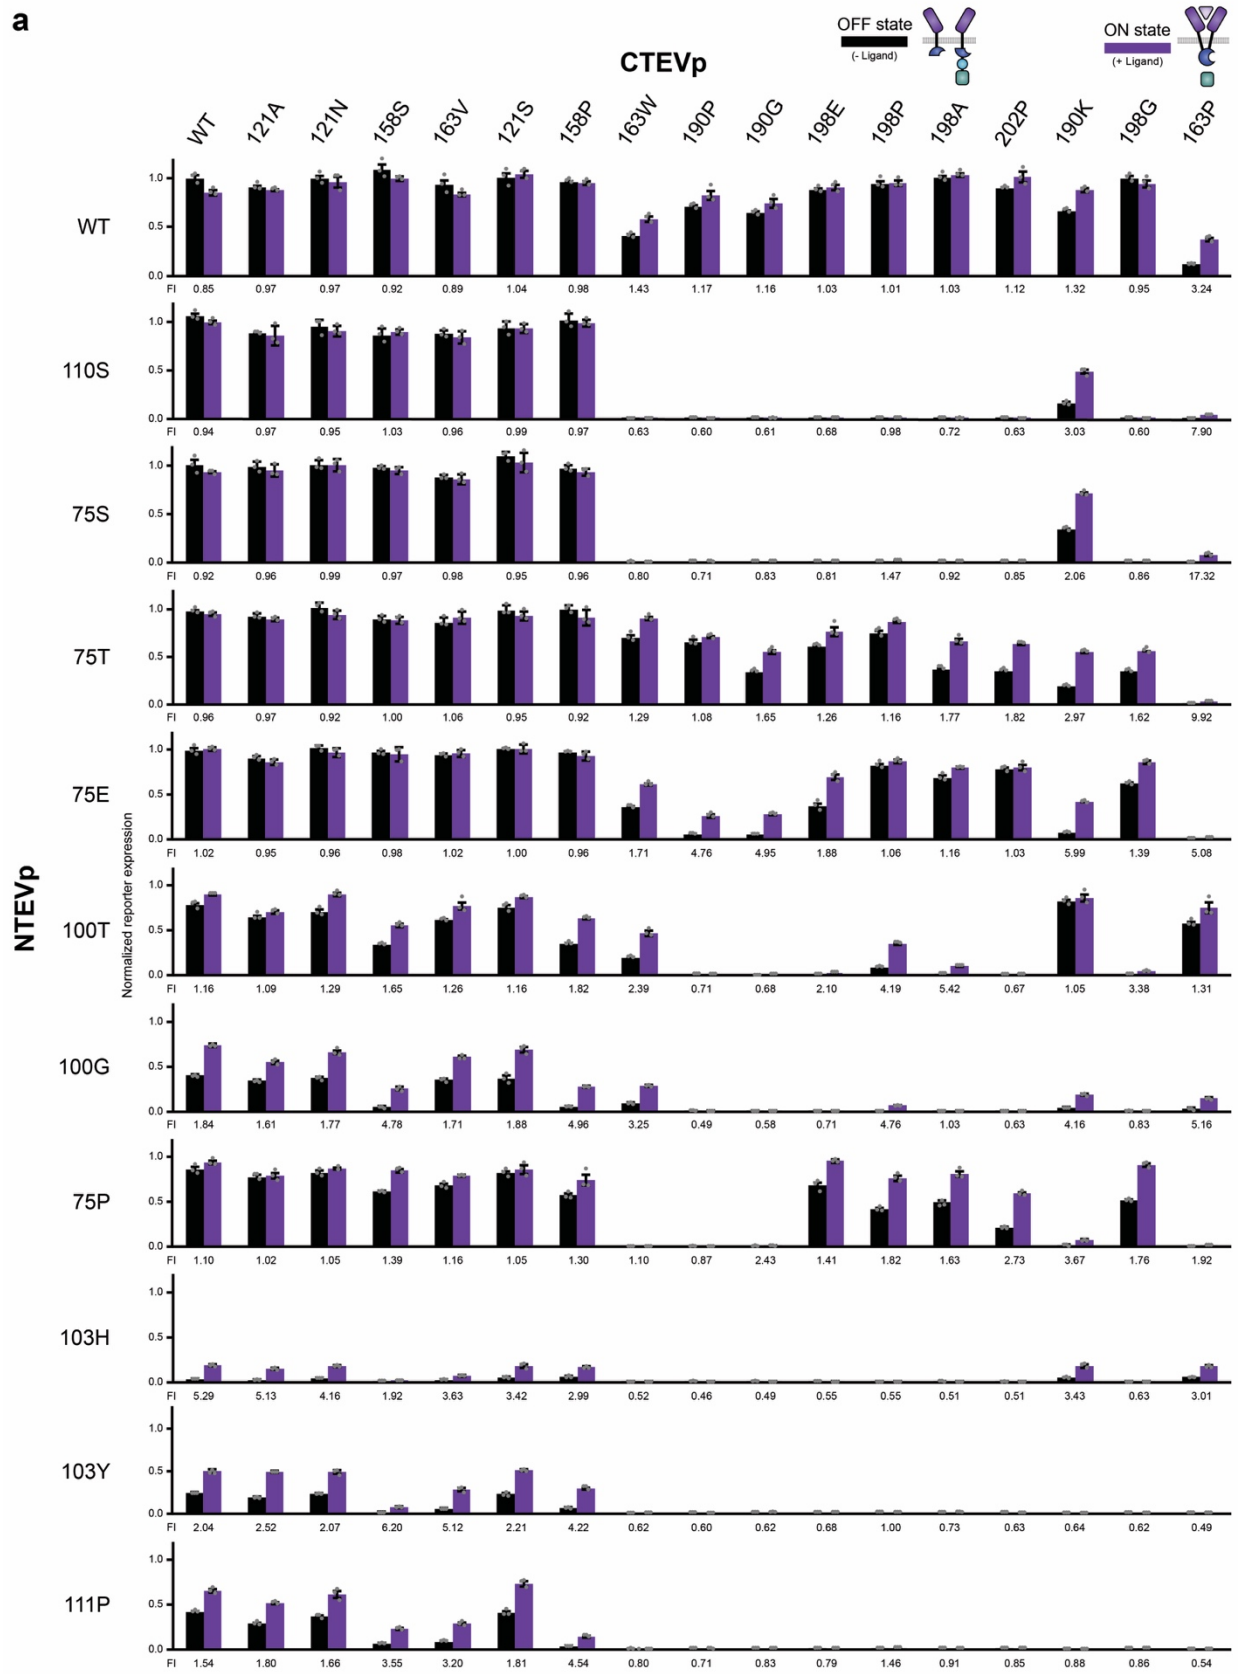

**b**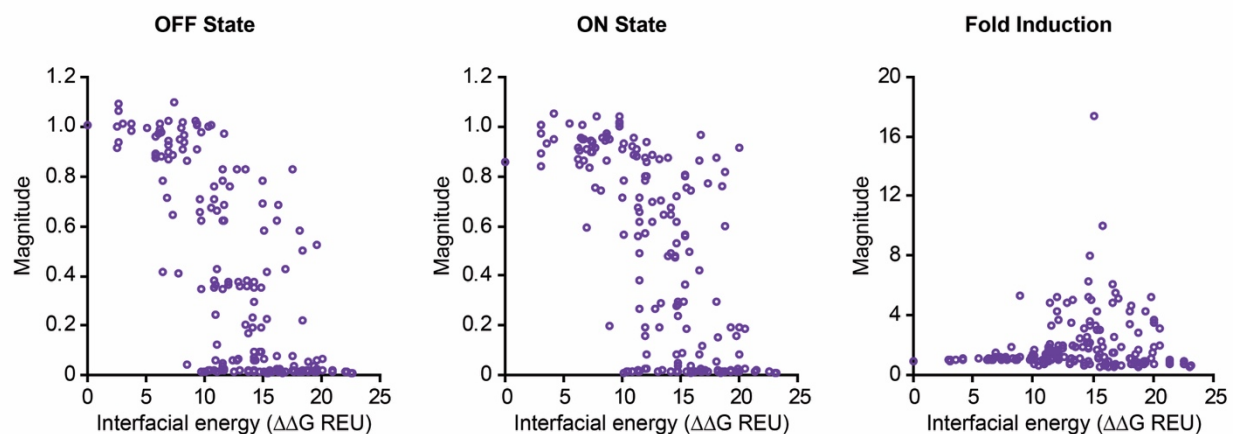

**Supplementary Fig. 11 Supplemental analyses of all experimentally evaluated mutants. a,** The complete data set of normalized reporter expression data reported in **Fig. 4a** as bubble plots is shown here in bar graph form. Fold induction (FI) is reported below each graph. Error bars depict S.E.M. Experiments were performed in biological triplicate. Results are representative of two independent biological experiments. **b,** All data reported in **Fig. 4a** are re-plotted here as a function of the interfacial energy calculated for each mutant/pair. A table of all calculated interfacial energy values for each mutant/pair is provided in **Supplementary Table 4**.

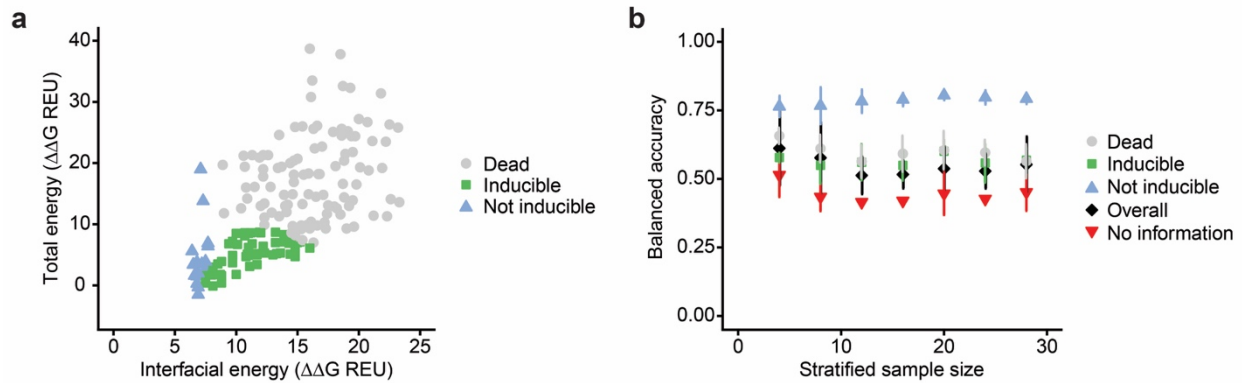

**Supplementary Fig. 12 Linear discriminant analysis (LDA) and retrospective bootstrapping.** **a**, Phenotype predictions for experimentally characterized variants (omitting the calibration set) using an LDA model trained on our actual 20-variant calibration set. Note that the phenotype boundaries determined by the LDA analysis are similar to those that were subjectively inferred (**Fig. 2e**). **b**, Accuracy of phenotype predictions as a function of sample size using a retrospective bootstrapping approach of all 193 experimentally characterized variants. Classification accuracies were generated using LDA models trained from 10-fold stratified bootstrap partitioning of experimentally characterized variants into training sets. Accuracy was computed on variants not included in each training set. Error bars indicate the standard deviations across the 10-fold bootstrapping. Details and code for the analysis presented here are included in **Supplementary Software 1**.

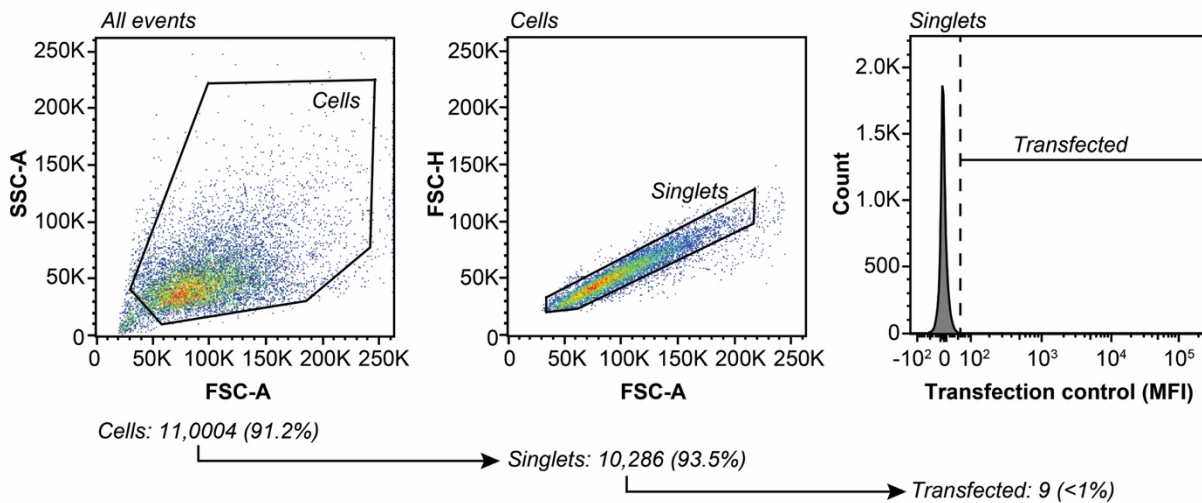

**Supplementary Fig. 13 Flow cytometry gating workflow.** The plots show cells transfected with pcDNA vector only to illustrate the flow cytometry gating strategy used to identify single transfected cells. HEK293FT cells were first identified by the FSC-A vs. SSC-A profile. From this population, singlets were identified by the FSC-A vs. FSC-H profile. The transfected population was defined as all single cells with a transfection control signal greater than the sample of single cells transfected with pcDNA only, encompassing no more than 1% of the pcDNA-only transfected population.

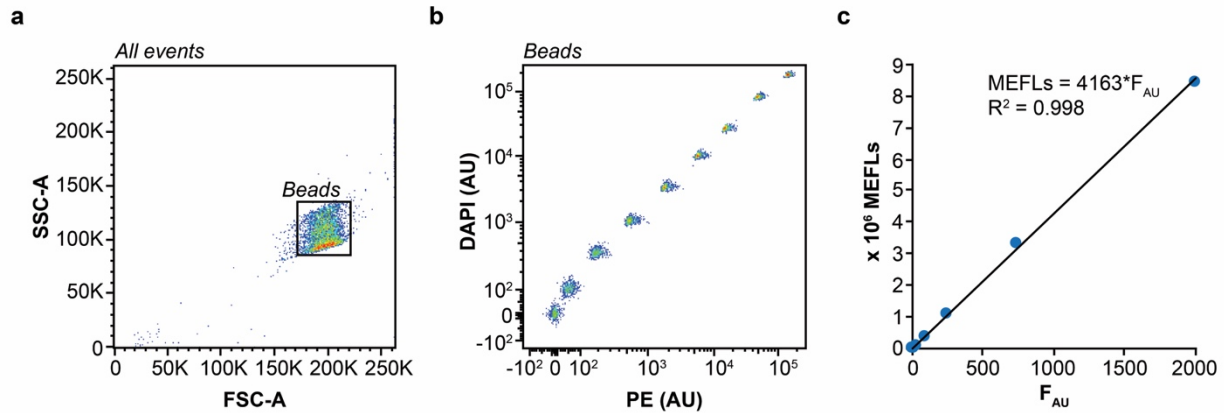

**Supplementary Fig. 14 Calibration of flow cytometry fluorescence intensities to absolute units with UltraRainbow beads.** **a**, For each flow cytometry-based experiment, the bead population was identified based on the FSC-A vs. SSC-A profile. **b**, Two fluorescent channels, other than the channel of interest, were used to identify the 9 bead populations. **c**, The mean fluorescence intensity (MFI) of each population in the FITC channel (used for EYFP reporter expression) in arbitrary units ( $F_{AU}$ ) was recorded and plotted against manufacturer provided values for fluorophores per bead for each populations (Molecules of Equivalent Fluorescein MEFLs). A calibration curve was generated, using a linear regression with y-intercept set to zero. This curve was used to convert exported MFI values to absolute units using the multiplier obtained from the regression.

## SUPPLEMENTARY TABLES

**Supplementary Table 1. Plasmid doses used in each figure**

| <b>Figure 2c</b>                                                                              |        |
|-----------------------------------------------------------------------------------------------|--------|
| <b>Plasmid doses:</b>                                                                         |        |
| EBFP2 transfection control                                                                    | 200 ng |
| Reporter plasmid (EYFP)                                                                       | 200 ng |
| NTEVp plasmid                                                                                 | 25 ng  |
| CTEVp plasmid                                                                                 | 25 ng  |
| pcDNA                                                                                         | 150 ng |
| <b>Plasmid numbers:</b>                                                                       |        |
| EBFP2: pPD193                                                                                 |        |
| Reporter: pPD463                                                                              |        |
| NTEVp: pTD798, pTD825, pTD827, pTD828, pTD829, pTD834, pTD835, pTD837, pTD839, pTD840, pTD841 |        |
| CTEVp: pTD799, pTD824, pTD826, pTD830, pTD831, pTD832, pTD833, pTD836, pTD838, pTD842, pTD843 |        |

| <b>Figure 3b</b>                                                      |        |
|-----------------------------------------------------------------------|--------|
| <b>Plasmid doses:</b>                                                 |        |
| EBFP2 transfection control                                            | 200 ng |
| Reporter plasmid (EYFP)                                               | 200 ng |
| NTEVp plasmid                                                         | 25 ng  |
| CTEVp plasmid                                                         | 25 ng  |
| pcDNA                                                                 | 150 ng |
| <b>Plasmid numbers:</b>                                               |        |
| EBFP2: pPD193                                                         |        |
| Reporter: pPD463                                                      |        |
| NTEVp: pTD825, pTD827, pTD828, pTD829, pTD837                         |        |
| CTEVp: pTD824, pTD826, pTD830, pTD831, pTD832, pTD833, pTD838, pTD843 |        |

| <b>Figure 3d</b>           |                                                                     |
|----------------------------|---------------------------------------------------------------------|
| <b>Plasmid doses:</b>      |                                                                     |
| EBFP2 transfection control | 200 ng                                                              |
| Reporter plasmid (EYFP)    | 200 ng                                                              |
| NTEVp plasmid              | 0.4 ng, 1.4 ng, 1 ng (order corresponding to plasmid numbers below) |
| CTEVp plasmid              | 5 ng, 12 ng (order corresponding to plasmid numbers below)          |
| pcDNA                      | 188 to 195 ng                                                       |
| <b>Plasmid numbers:</b>    |                                                                     |
| EBFP2: pPD193              |                                                                     |



|                               |
|-------------------------------|
| Reporter: pPD463              |
| NTEVp: pTD798, pTD825, pTD828 |
| CTEVp: pTD799, pTD843         |

| Figure 4a                                                                                                                                     |        |
|-----------------------------------------------------------------------------------------------------------------------------------------------|--------|
| <b>Plasmid doses:</b>                                                                                                                         |        |
| EBFP2 transfection control                                                                                                                    | 200 ng |
| Reporter plasmid (EYFP)                                                                                                                       | 200 ng |
| NTEVp plasmid                                                                                                                                 | 25 ng  |
| CTEVp plasmid                                                                                                                                 | 25 ng  |
| pcDNA                                                                                                                                         | 150 ng |
| <b>Plasmid numbers:</b>                                                                                                                       |        |
| EBFP2: pPD193                                                                                                                                 |        |
| Reporter: pPD463                                                                                                                              |        |
| NTEVp: pTD798, pTD825, pTD827, pTD828, pTD829, pTD837, pTD839, pTD863, pTD864, pTD866, pTD870                                                 |        |
| CTEVp: pTD799, pTD824, pTD826, pTD830, pTD831, pTD832, pTD833, pTD838, pTD843, pTD872, pTD873, pTD874, pTD875, pTD876, pTD877, pTD878, pTD879 |        |

| Figure 5b                                                                                                                                   |        |
|---------------------------------------------------------------------------------------------------------------------------------------------|--------|
| <b>Plasmid doses:</b>                                                                                                                       |        |
| EBFP2 transfection control                                                                                                                  | 200 ng |
| Reporter plasmid (EYFP)                                                                                                                     | 200 ng |
| TEVp plasmid                                                                                                                                | 25 ng  |
| tTA plasmid                                                                                                                                 | 50 ng  |
| pcDNA                                                                                                                                       | 125 ng |
| <b>Plasmid numbers:</b>                                                                                                                     |        |
| EBFP2: pPD193                                                                                                                               |        |
| Reporter: pPD463                                                                                                                            |        |
| TEVp: pPD801                                                                                                                                |        |
| tTA: pTD618, pTD619, pTD620, pTD621, pTD622, pTD623, pTD624, pTD625, pTD626, pTD627, pTD628, pTD629, pTD630, pTD631, pTD632, pTD634, pTD635 |        |

| Figure 5c                  |        |
|----------------------------|--------|
| <b>Plasmid doses:</b>      |        |
| EBFP2 transfection control | 200 ng |
| Reporter plasmid (EYFP)    | 200 ng |
| NTEVp plasmid              | 25 ng  |
| CTEVp plasmid              | 25 ng  |

|                                                       |        |
|-------------------------------------------------------|--------|
| tTA plasmid                                           | 50 ng  |
| pcDNA                                                 | 100 ng |
| <b>Plasmid numbers:</b>                               |        |
| EBFP2: pPD193                                         |        |
| Reporter: pPD463                                      |        |
| tTA: pTD634                                           |        |
| NTEVp: pTD811, pJB006, pJB007, pJB008, pJB009, pJB010 |        |
| CTEVp: pTD844, pJB011, pJB012, pJB013, pJB014, pJB015 |        |

| Supplementary Figure 1                |        |
|---------------------------------------|--------|
| <b>Plasmid doses:</b>                 |        |
| EBFP2 transfection control            | 200 ng |
| Reporter plasmid (EYFP)               | 200 ng |
| NTEVp plasmid                         | 25 ng  |
| CTEVp plasmid                         | 25 ng  |
| pcDNA                                 | 150 ng |
| <b>Plasmid numbers:</b>               |        |
| EBFP2: pPD193                         |        |
| Reporter: pPD463                      |        |
| NTEVp: pTD516, pTD518, pTD526, pTD527 |        |
| CTEVp: pTD524, pTD525, pTD528, pTD529 |        |

| Supplementary Figure 2                                        |        |
|---------------------------------------------------------------|--------|
| <b>Plasmid doses:</b>                                         |        |
| EBFP2 transfection control                                    | 200 ng |
| Reporter plasmid (EYFP)                                       | 200 ng |
| NTEVp plasmid                                                 | 25 ng  |
| CTEVp plasmid                                                 | 25 ng  |
| pcDNA                                                         | 150 ng |
| <b>Plasmid numbers:</b>                                       |        |
| EBFP2: pPD193                                                 |        |
| Reporter: pPD463                                              |        |
| NTEVp: pTD798, pTD800, pTD801, pTD802, pTD803, pTD804, pTD805 |        |
| CTEVp: pTD799, pTD806, pTD807, pTD808, pTD809, pTD810         |        |

| Supplementary Figure 4     |        |
|----------------------------|--------|
| <b>Plasmid doses:</b>      |        |
| EBFP2 transfection control | 200 ng |

|                                                                                               |        |
|-----------------------------------------------------------------------------------------------|--------|
| NTEVp plasmid                                                                                 | 100 ng |
| CTEVp plasmid                                                                                 | 100 ng |
| <b>Plasmid numbers:</b>                                                                       |        |
| EBFP2: pPD193                                                                                 |        |
| NTEVp: pTD798, pTD825, pTD827, pTD828, pTD829, pTD834, pTD835, pTD837, pTD839, pTD840, pTD841 |        |
| CTEVp: pTD799, pTD824, pTD826, pTD830, pTD831, pTD832, pTD833, pTD836, pTD838, pTD842, pTD843 |        |

| <b>Supplementary Figure 6</b>                                 |                                                                                                       |
|---------------------------------------------------------------|-------------------------------------------------------------------------------------------------------|
| <b>Plasmid doses:</b>                                         |                                                                                                       |
| EBFP2 transfection control                                    | 200 ng                                                                                                |
| NanoLuc control                                               | 1 ng                                                                                                  |
| NTEVp plasmid                                                 | 5 ng                                                                                                  |
| CTEVp plasmid                                                 | 100 ng, 100 ng, 100 ng, 100 ng, 200 ng, 200 ng, 200 ng (order corresponding to plasmid numbers below) |
| pcDNA                                                         | 100 to 395 ng                                                                                         |
| <b>Plasmid numbers:</b>                                       |                                                                                                       |
| EBFP2: pPD193                                                 |                                                                                                       |
| NanoLuc: pPD463                                               |                                                                                                       |
| NTEVp: pTD798, pTD825, pTD827, pTD828, pTD829, pTD837, pTD839 |                                                                                                       |
| CTEVp: pTD799, pTD824, pTD826, pTD830, pTD831, pTD838, pTD843 |                                                                                                       |

| <b>Supplementary Figure 7</b>                 |                                                                                     |
|-----------------------------------------------|-------------------------------------------------------------------------------------|
| <b>Plasmid doses:</b>                         |                                                                                     |
| EBFP2 transfection control                    | 200 ng                                                                              |
| Reporter plasmid (EYFP)                       | 200 ng                                                                              |
| NTEVp plasmid (DNA 1:1)                       | 25 ng                                                                               |
| NTEVp plasmid (Expression 1:1)                | 0.4 ng, 1.4 ng, 1 ng, 1.2 ng, 0.7 ng (order corresponding to plasmid numbers below) |
| CTEVp plasmid (DNA 1:1)                       | 25 ng                                                                               |
| CTEVp plasmid (Expression 1:1)                | 25 ng, 53.8 ng, 59.6 ng (order corresponding to plasmid numbers below)              |
| pcDNA                                         | 130 to 175 ng                                                                       |
| <b>Plasmid numbers:</b>                       |                                                                                     |
| EBFP2: pPD193                                 |                                                                                     |
| Reporter: pPD463                              |                                                                                     |
| NTEVp: pTD798, pTD825, pTD828, pTD837, pTD839 |                                                                                     |
| CTEVp: pTD799, pTD824, pTD843                 |                                                                                     |

| Supplementary Figure 9a,b                                     |                                                                       |
|---------------------------------------------------------------|-----------------------------------------------------------------------|
| <b>Plasmid doses:</b>                                         |                                                                       |
| EBFP2 transfection control                                    | 200 ng                                                                |
| NanoLuc control                                               | 1 ng                                                                  |
| NTEVp plasmid                                                 | 5 ng                                                                  |
| CTEVp plasmid                                                 | 100 ng, 100 ng, 200 ng (order corresponding to plasmid numbers below) |
| pcDNA                                                         | 195 to 295 ng                                                         |
| <b>Plasmid numbers:</b>                                       |                                                                       |
| EBFP2: pPD193                                                 |                                                                       |
| NanoLuc: pPD463                                               |                                                                       |
| NTEVp: pTD798, pTD825, pTD827, pTD828, pTD829, pTD837, pTD839 |                                                                       |
| CTEVp: pTD962, pTD963, pTD964                                 |                                                                       |

| Supplementary Figure 9c                       |        |
|-----------------------------------------------|--------|
| <b>Plasmid doses:</b>                         |        |
| EBFP2 transfection control                    | 200 ng |
| Reporter plasmid (EYFP)                       | 200 ng |
| NTEVp plasmid                                 | 25 ng  |
| CTEVp plasmid                                 | 25 ng  |
| pcDNA                                         | 150 ng |
| <b>Plasmid numbers:</b>                       |        |
| EBFP2: pPD193                                 |        |
| Reporter: pPD463                              |        |
| NTEVp: pTD798, pTD825, pTD828, pTD837, pTD839 |        |
| CTEVp: pTD799, pTD824, pTD843                 |        |

| Supplementary Figure 10b                                       |        |
|----------------------------------------------------------------|--------|
| <b>Plasmid doses:</b>                                          |        |
| mIRFP670 transfection control                                  | 200 ng |
| mCerulean-tagged NTEVp plasmid                                 | 25 ng  |
| mVenus-tagged CTEVp plasmid                                    | 25 ng  |
| pcDNA                                                          | 350 ng |
| <b>Plasmid numbers:</b>                                        |        |
| mIRFP670: pPD861                                               |        |
| mCerulean-tagged NTEVp: pTD954, pTD956, pTD957, pTD958, pTD959 |        |
| mVenus-tagged CTEVp: pTD955, pTD960, pTD961                    |        |

**Supplementary Table 2. BD LSR Fortessa instrument specifications for analytical flow cytometry to quantify reporter expression**

| <b>Fluorescent protein</b> | <b>Parameter</b> | <b>Excitation laser</b> | <b>Filter set</b> |
|----------------------------|------------------|-------------------------|-------------------|
| EBFP2                      | Pacific Blue     | Violet, 405 nm          | 450/50            |
| EYFP                       | FITC             | Blue, 488 nm            | 505LP, 530/30     |

**Supplementary Table 3. BD LSR Fortessa instrument specifications for analytical flow cytometry to quantify FRET**

| <b>Fluorescent protein</b> | <b>Parameter</b> | <b>Excitation laser</b> | <b>Filter set</b> |
|----------------------------|------------------|-------------------------|-------------------|
| mCerulean                  | Pacific Blue     | Violet, 405 nm          | 450/50            |
| mVenus                     | FITC             | Blue, 488 nm            | 505LP, 530/30     |
| FRET                       | AmCyan           | Violet, 405 nm          | 505LP, 530/30     |
| miRFP670                   | APC              | Red, 640 nm             | 670/30            |

**Supplementary Table 4. Calculated interfacial energy values for each mutant/pair**

| NTEVp | CTEVp | $\Delta\Delta G$<br>(REU) | NTEVp | CTEVp | $\Delta\Delta G$<br>(REU) | NTEVp | CTEVp | $\Delta\Delta G$<br>(REU) |
|-------|-------|---------------------------|-------|-------|---------------------------|-------|-------|---------------------------|
| WT    | WT    | 0                         | C110S | WT    | 3.2                       | H75S  | WT    | 3.6                       |
|       | M121A | 3.1                       |       | M121A | 6.3                       |       | M121A | 6.7                       |
|       | M121N | 3.1                       |       | M121N | 6.3                       |       | M121N | 6.7                       |
|       | T158S | 3.2                       |       | T158S | 6.4                       |       | T158S | 6.8                       |
|       | I163V | 3.2                       |       | I163V | 6.4                       |       | I163V | 6.8                       |
|       | M121S | 4.3                       |       | M121S | 7.5                       |       | M121S | 7.9                       |
|       | T158P | 6.6                       |       | T158P | 9.8                       |       | T158P | 10.2                      |
|       | I163W | 7                         |       | I163W | 10.2                      |       | I163W | 10.6                      |
|       | L190P | 7.3                       |       | L190P | 10.5                      |       | L190P | 10.9                      |
|       | L190G | 7.8                       |       | L190G | 11                        |       | L190G | 11.4                      |
|       | W198E | 7.8                       |       | W198E | 11                        |       | W198E | 11.4                      |
|       | W198P | 8.4                       |       | W198P | 11.6                      |       | W198P | 12                        |
|       | W198A | 9.9                       |       | W198A | 13.1                      |       | W198A | 13.5                      |
|       | W202P | 9.9                       |       | W202P | 13.1                      |       | W202P | 13.5                      |
|       | L190K | 11.1                      |       | L190K | 14.3                      |       | L190K | 14.7                      |
| W198G | 11.1  | W198G                     | 14.3  | W198G | 14.7                      |       |       |                           |
| I163P | 11.6  | I163P                     | 14.8  | I163P | 15.2                      |       |       |                           |
| H75T  | WT    | 4.3                       | H75E  | WT    | 5.6                       | F100T | WT    | 7                         |
|       | M121A | 7.4                       |       | M121A | 8.7                       |       | M121A | 10.1                      |
|       | M121N | 7.4                       |       | M121N | 8.7                       |       | M121N | 10.1                      |
|       | T158S | 7.5                       |       | T158S | 8.8                       |       | T158S | 10.2                      |
|       | I163V | 7.5                       |       | I163V | 8.8                       |       | I163V | 10.2                      |
|       | M121S | 8.6                       |       | M121S | 9.9                       |       | M121S | 11.3                      |
|       | T158P | 10.9                      |       | T158P | 12.2                      |       | T158P | 13.6                      |
|       | I163W | 11.3                      |       | I163W | 12.6                      |       | I163W | 14                        |
|       | L190P | 11.6                      |       | L190P | 12.9                      |       | L190P | 14.3                      |
|       | L190G | 12.1                      |       | L190G | 13.4                      |       | L190G | 14.8                      |
|       | W198E | 12.1                      |       | W198E | 13.4                      |       | W198E | 14.8                      |
|       | W198P | 12.7                      |       | W198P | 14                        |       | W198P | 15.4                      |
|       | W198A | 14.2                      |       | W198A | 15.5                      |       | W198A | 16.9                      |
|       | W202P | 14.2                      |       | W202P | 15.5                      |       | W202P | 16.9                      |
|       | L190K | 15.4                      |       | L190K | 16.7                      |       | L190K | 18.1                      |
| W198G | 15.4  | W198G                     | 16.7  | W198G | 18.1                      |       |       |                           |
| I163P | 15.9  | I163P                     | 17.2  | I163P | 18.6                      |       |       |                           |

|       |       |      |
|-------|-------|------|
| F100G | WT    | 8.3  |
|       | M121A | 11.4 |
|       | M121N | 11.4 |
|       | T158S | 11.5 |
|       | I163V | 11.5 |
|       | M121S | 12.6 |
|       | T158P | 14.9 |
|       | I163W | 15.3 |
|       | L190P | 15.6 |
|       | L190G | 16.1 |
|       | W198E | 16.1 |
|       | W198P | 16.7 |
|       | W198A | 18.2 |
|       | W202P | 18.2 |
|       | L190K | 19.4 |
| W198G | 19.4  |      |
| I163P | 19.9  |      |
| P103Y | WT    | 11.5 |
|       | M121A | 14.6 |
|       | M121N | 14.6 |
|       | T158S | 14.7 |
|       | I163V | 14.7 |
|       | M121S | 15.8 |
|       | T158P | 18.1 |
|       | I163W | 18.5 |
|       | L190P | 18.8 |
|       | L190G | 19.3 |
|       | W198E | 19.3 |
|       | W198P | 19.9 |
|       | W198A | 21.4 |
|       | W202P | 21.4 |
|       | L190K | 22.6 |
| W198G | 22.6  |      |
| I163P | 23.1  |      |

|       |       |      |
|-------|-------|------|
| H75P  | WT    | 9    |
|       | M121A | 12.1 |
|       | M121N | 12.1 |
|       | T158S | 12.2 |
|       | I163V | 12.2 |
|       | M121S | 13.3 |
|       | T158P | 15.6 |
|       | I163W | 16   |
|       | L190P | 16.3 |
|       | L190G | 16.8 |
|       | W198E | 16.8 |
|       | W198P | 17.4 |
|       | W198A | 18.9 |
|       | W202P | 18.9 |
|       | L190K | 20.1 |
| W198G | 20.1  |      |
| I163P | 20.6  |      |
| L111P | WT    | 11.6 |
|       | M121A | 14.7 |
|       | M121N | 14.7 |
|       | T158S | 14.8 |
|       | I163V | 14.8 |
|       | M121S | 15.9 |
|       | T158P | 18.2 |
|       | I163W | 18.6 |
|       | L190P | 18.9 |
|       | L190G | 19.3 |
|       | W198E | 19.4 |
|       | W198P | 20   |
|       | W198A | 21.5 |
|       | W202P | 21.5 |
|       | L190K | 22.7 |
| W198G | 22.7  |      |
| I163P | 23.2  |      |

|       |       |      |
|-------|-------|------|
| P103H | WT    | 9    |
|       | M121A | 12.1 |
|       | M121N | 12.1 |
|       | T158S | 12.2 |
|       | I163V | 12.2 |
|       | M121S | 13.3 |
|       | T158P | 15.6 |
|       | I163W | 16   |
|       | L190P | 16.3 |
|       | L190G | 16.8 |
|       | W198E | 16.8 |
|       | W198P | 17.4 |
|       | W198A | 18.9 |
|       | W202P | 18.9 |
|       | L190K | 20.1 |
| W198G | 20.1  |      |
| I163P | 20.6  |      |

## SUPPLEMENTARY NOTE

### Supplementary Note 1. Rosetta calculations used in this manuscript Computational Interface Scanning

Local Rosetta runs were performed with release version 3.9. The ref2015 scoring function was used for all calculations.

#### Protein Preparation

The structure of TEVp was obtained from the Research Crystallography for Structural Bioinformatics (RCSB) PDB (ID code: 1LVM). Chain designations A and B were used for residues 4-118 (NTEVp) and 119-221 (CTEVp), respectively. The structure was idealized, which sets bond lengths and angles to their ideal values and then minimizes the structure in the presence of coordinate constraints.

#### Commands:

```
`${path_to_Rosetta}/main/source/bin/idealize_jd2.linuxgccrelease
  -database `${path_to_Rosetta}/main/database
  -in::file::fullatom
  -s 1LVM.pdb
  -no_optH false
  -flip_HNQ
```

#### Interface Mutagenesis

The idealized structure of TEVp was relaxed (100 iterations) using the default constrained relax script, and position constraints were added to backbone heavy atoms based on the crystal structure. During this relax procedure, Rosetta resfiles were used to incorporate single (or double) mutations.

#### Commands:

```
`${path_to_Rosetta}/main/source/bin/relax.linuxgccrelease
  -database `${path_to_Rosetta}/main/database
  -relax::sequence_file always_constrained_relax.script
  -constrain_relax_to_start_coords
  -relax::coord_cst_width 0.25 -relax::coord_cst_stdev 0.25
  -s 1LVM.pdb
  -in::file::fullatom
  -no_optH false
  -flip_HNQ
  -nstruct 100
  -packing:resfile ${mutant}.resfile
  -relax:respect_resfile
```

#### *always constrained relax.script:*

```
repeat 5
  ramp_repack_min 0.02 0.01 1.0
  ramp_repack_min 0.250 0.01 1.0
  ramp_repack_min 0.550 0.01 1.0
  ramp_repack_min 1 0.00001 1.0
  accept_to_best
endrepeat
```

#### *example \${mutant}.resfile:*

```
AUTO
NATAA
start
75 A PIKAA A
```

#### Interface Scoring

The interfacial energy was computed for all relaxed structures of each variant using the rosetta\_scripts application with the InterfaceAnalyzerMover. This mover calculates the total interaction energy between all residues in chain A (nTEV) with residues in chain B (cTEV).

#### Commands:

```
`${path_to_Rosetta}/main/source/bin/rosetta_scripts.linuxgccrelease
  -database `${path_to_Rosetta}/main/database
```



```
-parser:protocol interface_score.script  
-file:s ${mutant}.pdb
```

*interface\_score.script*

```
<ROSETTASCRIPTS>  
  <TASKOPERATIONS>  
  </TASKOPERATIONS>  
  <SCOREFXNS>  
  </SCOREFXNS>  
  <FILTERS>  
  </FILTERS>  
  <MOVERS>  
    <InterfaceAnalyzerMover name="score_int" pack_separated="false" pack_input="false"  
    packstat="false" interface_sc="true" ligandchain="B"/>  
  </MOVERS>  
  <PROTOCOLS>  
    <Add mover_name="score_int"/>  
  </PROTOCOLS>  
</ROSETTASCRIPTS>
```

#### **REFERENCES CITED IN THIS DOCUMENT**

1. Edelstein, H.I. et al. Elucidation And Refinement Of Synthetic Receptor Mechanisms. *Synthetic Biology* (2020).
