# Supplementary material
Source: PubMed Central journal article supplement (PMC8084939)
Supplement: NIHMS1657285-supplement-1657285_Supp_Software1.pdf [file NIHMS1657285-supplement-1657285_Supp_Software1.pdf]

```

#Logistic regression analysis:
#We used logistic regression as a linear classification tool to relate
experimentally determined phenotypes to the Rosetta computed energy
landscape. During this type of analysis, hyperplanes in feature space are
defined and used to separate observations belonging to different classes.
All data preparation and logistic regression analyses were performed using
R version 3.6.1. Stratified sampling and logistic regression using the
linear discriminant analysis method (see commands below) were conducted
with the dplyr and caret packages.
#Data stratification:
#Stratified sampling reduces the likelihood of randomly sampling the same
region of the energy landscape when selecting data to form calibration
sets; sampling across the range of ???G values increases the probability
of sampling members of each phenotype, which is necessary for determining
the energy partitions. The comprehensive Rosetta computed ???GTotal vs
???GInterfacial energy landscape of all single (285) and double or paired
mutants (37,905) was generated and divided into 4 evenly populated strata
(I, II, III, and IV). To generate the strata, the data were first
partitioned using the median ???GTotal, and then these subgroups were
further partitioned by their median ???GInterfacial. The strata boundaries
were drawn from this ~38,000-member set because these would be the only
data available at this stage if we were applying SPORT to a new split
protein system. The 193 experimentally characterized TEVp variants were
mapped to these strata for the retrospective stratified bootstrap sampling
analysis.
#Commands:
library(caret)
library(dplyr)
#LDA of our actual calibration set
cal <- read.csv("actual_calibration_set.csv", header=T)
new <- read.csv("stratified_after_calibration_set.csv", header=T)
train <- cal
test <- new
train_ddg <- cbind(train$ddG_total, train$ddG_interfacial)
train_pheno <- as.factor(as.character(train$phenotype))
test_ddg <- cbind(test$ddG_total, test$ddG_interfacial)
test_pheno <- factor(test$phenotype, levels=levels(train_pheno))
lda_model <- train(x=train_ddg, y=train_pheno, method="lda",
metric="Accuracy")
lda_pred <- predict(lda_model, test_ddg)confusionMatrix(lda_pred,
as.factor(test_pheno))

#Retrospective LDA using stratified bootstrap sampling of characterized
variants
data <- read.csv("stratified_all_tested_data.csv", header=T)
for(size in 1:7) #since there are 4 strata, we are sampling 4, 8, .., 28
variants
{
  for(samp_set in 1:10)
  {
    set.seed(size*samp_set+100)
    strat_samp <- as.data.frame(data %>% group_by(strata) %>%
sample_n(size) %>% ungroup)
    train <- data[strat_samp[,1],]
    test <- data[-strat_samp[,1],]
    train_ddg <- cbind(train$ddG_total, train$ddG_interfacial)

```

```

train_pheno <- as.factor(as.character(train$phenotype))
test_ddg <- cbind(test$ddG_total, test$ddG_interfacial)
test_pheno <- factor(test$phenotype,
levels=levels(train_pheno))
lda_model <- train(x=train_ddg, y=train_pheno,
method="lda", metric="Accuracy")
lda_pred <- predict(lda_model, test_ddg)
cm <- confusionMatrix(lda_pred, as.factor(test_pheno))
temp_byclass <- as.table(cm$byClass)
temp_overall <- as.table(cm$overall)
if(samp_set==1)
{
  byclass <- temp_byclass
  overall <- temp_overall
} else
{
  byclass <- rbind(byclass, temp_byclass)
  overall <- rbind(overall, temp_overall)
}
}
notInd <- subset(byclass, row.names(byclass)=="Class: not inducible")
Ind <- subset(byclass, row.names(byclass)=="Class: inducible")
Dead <- subset(byclass, row.names(byclass)=="Class: dead")
all_overall <- overall[1:2,]
row.names(all_overall) <- c('mean','sd')
all_notInd <- byclass[1:2,]
row.names(all_notInd) <- c('mean','sd')
all_Ind <- all_notInd
all_Dead <- all_Ind
for(param in 1:length(overall[1,]))
{
  all_overall[1,param] <- mean(overall[1:length(overall[,1]),param],
na.rm = TRUE)
  all_overall[2,param] <- sd(overall[1:length(overall[,1]),param], na.rm
= TRUE)
}
for(param in 1:length(byclass[1,]))
{
  all_notInd[1,param] <- mean(notInd[1:length(notInd[,1]),param], na.rm =
TRUE)
  all_notInd[2,param] <- sd(notInd[1:length(notInd[,1]),param], na.rm =
TRUE)
  all_Ind[1,param] <- mean(Ind[1:length(Ind[,1]),param], na.rm = TRUE)
  all_Ind[2,param] <- sd(Ind[1:length(Ind[,1]),param], na.rm = TRUE)
  all_Dead[1,param] <- mean(Dead[1:length(Dead[,1]),param], na.rm = TRUE)
  all_Dead[2,param] <- sd(Dead[1:length(Dead[,1]),param], na.rm = TRUE)
}
}
if(size==1)
{
  mean_overall <- all_overall[1,]
  sd_overall <- all_overall[2,]
  mean_notInd <- all_notInd[1,]
  sd_notInd <- all_notInd[2,]
  mean_Ind <- all_Ind[1,]
  sd_Ind <- all_Ind[2,]
  mean_Dead <- all_Dead[1,]
  sd_Dead <- all_Dead[2,]
}

```

```
} else
{
  mean_overall <- rbind(mean_overall,all_overall[1,])
  sd_overall <- rbind(sd_overall,all_overall[2,])
  mean_notInd <- rbind(mean_notInd,all_notInd[1,])
  sd_notInd <- rbind(sd_notInd,all_notInd[2,])
  mean_Ind <- rbind(mean_Ind,all_Ind[1,])
  sd_Ind <- rbind(sd_Ind,all_Ind[2,])
  mean_Dead <- rbind(mean_Dead,all_Dead[1,])
  sd_Dead <- rbind(sd_Dead,all_Dead[2,])
}
}
```
