# Supplementary material
Source: PubMed Central journal article supplement (PMC8084939)
Supplement: NIHMS1657285-supplement-1657285_Supp_Software2.pdf [file NIHMS1657285-supplement-1657285_Supp_Software2.pdf]

```

{
  "cells": [
    {
      "cell_type": "code",
      "execution_count": 1,
      "metadata": {
        "collapsed": true
      },
      "outputs": [],
      "source": [
        "%matplotlib inline"
      ]
    },
    {
      "cell_type": "code",
      "execution_count": 2,
      "metadata": {
        "collapsed": true
      },
      "outputs": [],
      "source": [
        "import pandas as pd\n",
        "import matplotlib.pyplot as plt\n",
        "import matplotlib.colors as mcolors\n",
        "import matplotlib.colorbar as mcb\n",
        "import matplotlib.cm as cm\n",
        "import matplotlib.style as mstyle\n",
        "import numpy as np\n",
        "from mpl_toolkits.axes_grid1.axes_divider import
make_axes_locatable\n",
        "import seaborn as sns"
      ]
    },
    {
      "cell_type": "code",
      "execution_count": 3,
      "metadata": {
        "collapsed": true
      },
      "outputs": [],
      "source": [
        "def parseData(df):\n",
        "    CTevs = df.CTev.unique()\n",
        "    NTEvs = df.NTEv.unique()\n",
        "    NTEvs = list(reversed(NTEvs))\n",
        "    dataON = []\n",
        "    dataOFF = []\n",
        "    dataFI = []\n",
        "    dataG = []\n",
        "    for nte in NTEvs:\n",
        "        ONS = []\n",
        "        OFFS = []\n",
        "        FIS = []\n",
        "        GS = []\n",
        "        for cte in CTevs:\n",

```

```

"         dfN = df.loc[df['NTev'] == ntev]\n",
"         dfNC = dfN.loc[df['CTev'] == ctev]\n",
"         ONS.append(dfNC['ON'].item())\n",
"         OFFS.append(dfNC['OFF'].item())\n",
"         FIS.append(dfNC['FI'].item())\n",
"         GS.append(dfNC['Delta G'].item())\n",
"         dataON.append(ONS)\n",
"         dataOFF.append(OFFS)\n",
"         dataFI.append(FIS)\n",
"         dataG.append(GS)\n",
"     return NTevs, CTevs, dataON, dataOFF, dataFI, dataG"
]
},
{
"cell_type": "code",
"execution_count": 4,
"metadata": {
"collapsed": true
},
"outputs": [],
"source": [
"def plotDataEdgesBGR(NTevs, CTevs, dataON, dataOFF, dataFI, dataG,
minDot, title, filetype):\n",
"    cmap = mcolors.LinearSegmentedColormap.from_list(\"\", [(0, (0.2,
0.2, 0.4)), \n",
"    (0.1666, (0.8980392156862745, 0.8980392156862745, 0.8980392156862745)), \n",
"    (0.8823529411764706, 0.1607843137254902, 0.09411764705882353))])\n",
"    normalizeH = mcolors.Normalize(vmin=-5, vmax=25)\n",
"    mstyle.use('default')\n",
"    \n",
"    figBubbleON = plt.figure(figsize=(30,25))\n",
"    dfSNSON = pd.DataFrame({'CTev' : [], 'NTev' : [], 'Magnitude' :
[], 'Delta G' : []})\n",
"    EdgeList = []\n",
"    for i in range(0,len(dataON)):\n",
"        for j in range(0,len(dataON[i])):\n",
"            if dataFI[i][j] == dataFI[i][j]:\n",
"                if dataFI[i][j] >= 1.2:\n",
"                    edge = 'black' \n",
"                else:\n",
"                    edge = 'none'\n",
"                EdgeList.append(edge)\n",
"            dfSNSON = dfSNSON.append({'CTev' : j, 'NTev': i,
'Magnitude': dataON[i][j], 'Delta G' : dataG[i][j]},\n",
"                                     ignore_index=True)\n",
"            axON = sns.scatterplot(x='CTev', y='NTev', data=dfSNSON,
hue='Delta G', hue_norm=normalizeH, size='Magnitude', \n",
"                                   palette=cmap, edgecolor=EdgeList,
linewidth=2, sizes=(minDot,5000))\n",
"            hON,lON = axON.get_legend_handles_labels()\n",
"            axON.legend(hON[-5:],lON[-5:], bbox_to_anchor=(1.22, 1.0),
frameon=False, labelspacing=5, handletextpad=5)\n",
"            plt.setp(axON.get_legend().get_texts(), fontsize=30)\n",
"            plt.setp(axON.get_legend().get_title(), fontsize=50)\n",

```

```

"    axON.set_xticks(np.arange(len(CTeVs))\n",
"    axON.set_yticks(np.arange(len(NTeVs))\n",
"    axON.set_xticklabels(CTeVs, size=30, fontname='Arial',
rotation=45)\n",
"    axON.set_yticklabels(NTeVs, size=30, fontname='Arial')\n",
"    axON.yaxis.set_ticks_position('left')\n",
"    axON.xaxis.set_ticks_position('top')\n",
"    axON.tick_params(top=False, left=False, labeltop=True,
labelleft=True)\n",
"    axON.set_xlabel('CTEV', fontsize=40, fontname='Arial',
fontweight='bold', labelpad=20)\n",
"    axON.set_ylabel('NTEV', fontsize=40, fontname='Arial',
fontweight='bold', labelpad=20)\n",
"    axON.xaxis.set_label_position('top')\n",
"    axON.set_title('ON', fontsize=50, fontname='Arial',
fontweight='bold', pad=40)\n",
"    dividerON = make_axes_locatable(axON)\n",
"    caxON, kwON = mcbbar.make_axes(axON, shrink=0.5, pad=0.02,
anchor=(0.0,0.0))\n",
"    cbarON = mcbbar.ColorbarBase(caxON, cmap=cmap, norm=normalizeH)\n",
"    cbarON.set_label('Delta G', fontsize=30, fontname='Arial',
rotation=360, labelpad=90)\n",
"    cbarON.ax.tick_params(labelsize=30)\n",
"    cbarON.ax.tick_params(pad=15)\n",
"    plt.savefig(title + 'ON.' + filetype)\n",
"    \n",
"    figBubbleOFF = plt.figure(figsize=(30,25))\n",
"    dfSNSOFF = pd.DataFrame({'CTev' : [], 'NTev' : [], 'Magnitude' :
[], 'Delta G' : []})\n",
"    for i in range(0,len(dataOFF)):\n",
"        for j in range(0,len(dataOFF[i])):\n",
"            dfSNSOFF = dfSNSOFF.append({'CTev' : j, 'NTev': i,
'Magnitude': dataOFF[i][j], 'Delta G' : dataG[i][j]},\n",
"                                       ignore_index=True)\n",
"    axOFF = sns.scatterplot(x='CTev', y='NTev', data=dfSNSOFF,
hue='Delta G', hue_norm=normalizeH, size='Magnitude', \n",
"                           palette=cmap, edgecolor=EdgeList,
linewidth=2, sizes=(minDot,5000))\n",
"    hOFF,lOFF = axOFF.get_legend_handles_labels()\n",
"    axOFF.legend(hOFF[-5:],lOFF[-5:], bbox_to_anchor=(1.22, 1.0),
frameon=False, labelspacing=5, handletextpad=5)\n",
"    plt.setp(axOFF.get_legend().get_texts(), fontsize=30)\n",
"    plt.setp(axOFF.get_legend().get_title(), fontsize=50)\n",
"    axOFF.set_xticks(np.arange(len(CTeVs))\n",
"    axOFF.set_yticks(np.arange(len(NTeVs))\n",
"    axOFF.set_xticklabels(CTeVs, size=30, fontname='Arial',
rotation=45)\n",
"    axOFF.set_yticklabels(NTeVs, size=30, fontname='Arial')\n",
"    axOFF.yaxis.set_ticks_position('left')\n",
"    axOFF.xaxis.set_ticks_position('top')\n",
"    axOFF.tick_params(top=False, left=False, labeltop=True,
labelleft=True)\n",
"    axOFF.set_xlabel('CTEV', fontsize=40, fontname='Arial',
fontweight='bold', labelpad=20)\n",
"    axOFF.set_ylabel('NTEV', fontsize=40, fontname='Arial',
fontweight='bold', labelpad=20)\n",

```

```

"    axOFF.xaxis.set_label_position('top')\n",
"    axOFF.set_title('OFF', fontsize=50, fontname='Arial',
fontweight='bold', pad=40)\n",
"    dividerOFF = make_axes_locatable(axOFF)\n",
"    caxOFF, kwON = mcbbar.make_axes(axOFF, shrink=0.5, pad=0.02,
anchor=(0.0,0.0))\n",
"    cbarOFF = mcbbar.ColorbarBase(caxOFF, cmap=cmap,
norm=normalizeH)\n",
"    cbarOFF.set_label('Delta G', fontsize=30, fontname='Arial',
rotation=360, labelpad=90)\n",
"    cbarOFF.ax.tick_params(labelsize=30)\n",
"    cbarOFF.ax.tick_params(pad=15)\n",
"    plt.savefig(title + 'OFF.' + filetype)\n",
"    \n",
"    figBubbleFI = plt.figure(figsize=(30,25))\n",
"    dfSNSFI = pd.DataFrame({'CTev' : [], 'NTev' : [], 'FI' : [],
'Delta G' : [], })\n",
"    for i in range(0,len(dataFI)):\n",
"        for j in range(0,len(dataFI[i])):\n",
"            dfSNSFI = dfSNSFI.append({'CTev' : j, 'NTev': i, 'FI':
dataFI[i][j], 'Delta G' : dataG[i][j]}, ignore_index=True)\n",
"            axFI = sns.scatterplot(x='CTev', y='NTev', data=dfSNSFI,
hue='Delta G', hue_norm=normalizeH, size='FI', \n",
"                palette=cmap, edgecolor=EdgeList,
linewidth=2, sizes=(minDot,5000))\n",
"            hFI,lFI = axFI.get_legend_handles_labels()\n",
"            axFI.legend(hFI[-5:],lFI[-5:], bbox_to_anchor=(1.15, 1.0),
frameon=False, labelspacing=5, handletextpad=5)\n",
"            plt.setp(axFI.get_legend().get_texts(), fontsize=30)\n",
"            plt.setp(axFI.get_legend().get_title(), fontsize=50)\n",
"            axFI.set_xticks(np.arange(len(CTevs))\n",
"            axFI.set_yticks(np.arange(len(NTevs))\n",
"            axFI.set_xticklabels(CTevs, size=30, fontname='Arial',
rotation=45)\n",
"            axFI.set_yticklabels(NTevs, size=30, fontname='Arial')\n",
"            axFI.yaxis.set_ticks_position('left')\n",
"            axFI.xaxis.set_ticks_position('top')\n",
"            axFI.tick_params(top=False, left=False, labeltop=True,
labeleft=True)\n",
"            axFI.set_xlabel('CTEV', fontsize=40, fontname='Arial',
fontweight='bold', labelpad=20)\n",
"            axFI.set_ylabel('NTEV', fontsize=40, fontname='Arial',
fontweight='bold', labelpad=20)\n",
"            axFI.xaxis.set_label_position('top')\n",
"            axFI.set_title('FI', fontsize=50, fontname='Arial',
fontweight='bold', pad=40)\n",
"            dividerFI = make_axes_locatable(axFI)\n",
"            caxFI, kwFI = mcbbar.make_axes(axFI, shrink=0.5, pad=0.02,
anchor=(0.0,0.0))\n",
"            cbarFI = mcbbar.ColorbarBase(caxFI, cmap=cmap, norm=normalizeH)\n",
"            cbarFI.set_label('Delta G', fontsize=30, fontname='Arial',
rotation=360, labelpad=90)\n",
"            cbarFI.ax.tick_params(labelsize=30)\n",
"            cbarFI.ax.tick_params(pad=15)\n",
"            plt.savefig(title + 'FI.' + filetype)"
]

```

```
},
{
  "cell_type": "code",
  "execution_count": null,
  "metadata": {
    "collapsed": true
  },
  "outputs": [],
  "source": []
}
],
"metadata": {
  "kernelspec": {
    "display_name": "Python 3",
    "language": "python",
    "name": "python3"
  },
  "language_info": {
    "codemirror_mode": {
      "name": "ipython",
      "version": 3
    },
    "file_extension": ".py",
    "mimetype": "text/x-python",
    "name": "python",
    "nbconvert_exporter": "python",
    "pygments_lexer": "ipython3",
    "version": "3.6.8"
  }
},
"nbformat": 4,
"nbformat_minor": 2
}
```
